# Supplementary material for: Controlled Growth of Porous InBr3: PbBr2 Film for Preparation of CsPbBr3 in Carbon-Based Planar Perovskite Solar Cells
Source: MDPI journal article supplement (doi:10.3390/nano11092408), 2021-09-16
Supplement: s1 [file s1]

# Controlled Growth of Porous $\text{InBr}_3$ : $\text{PbBr}_2$ Film for Preparation of $\text{CsPbBr}_3$ in Carbon-Based Planar Perovskite Solar Cells

Kailin Chi <sup>1,\*</sup>, Hansi Xu <sup>1</sup>, Bingtao Feng <sup>2</sup>, Xianwei Meng <sup>2</sup>, Daoyu Yu <sup>1</sup> and Qian Li <sup>3,\*</sup>

<sup>1</sup> School of Science, Northeast Electric Power University, Jilin 132012, China; 20182815@neepu.edu.cn (H.X.); 2018309050138@neepu.edu.cn (D.Y.)

<sup>2</sup> State Key Laboratory of Superhard Materials, College of Physics, Jilin University, Changchun 130012, China; fengbt20@mails.jlu.edu.cn (B.F.); xwmeng17@mails.jlu.edu.cn (X.M.)

<sup>3</sup> Beijing Key Lab of Cryo-Biomedical Engineering and Key Lab of Cryogenics, Technical Institute of Physics and Chemistry, Chinese Academy of Sciences, Beijing 100190, China; liqian@mail.ipc.ac.cn

\* Correspondence: kailinchi@neepu.edu.cn (K.C.); liqian@mail.ipc.ac.cn (Q.L.);  
Tel./Fax: +86-0432-64806674 (K.C.); +86-010-82543763 (Q.L.)

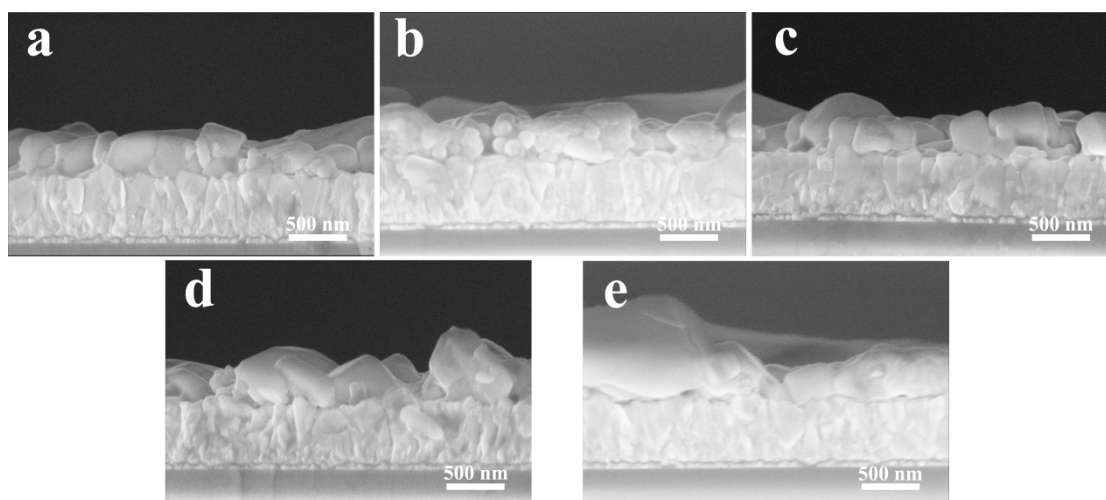

**Figure S1.** Cross-sectional SEM images of  $\text{PbBr}_2$  films synthesized with different  $\text{PbBr}_2$  concentration: (a) 1.0 M w/  $\text{InBr}_3$ ; (b) 1.1 M w/  $\text{InBr}_3$ ; (c) 1.2 M w/  $\text{InBr}_3$ ; (d) 1.3 M w/  $\text{InBr}_3$ ; (e) 1.4 M w/  $\text{InBr}_3$ .

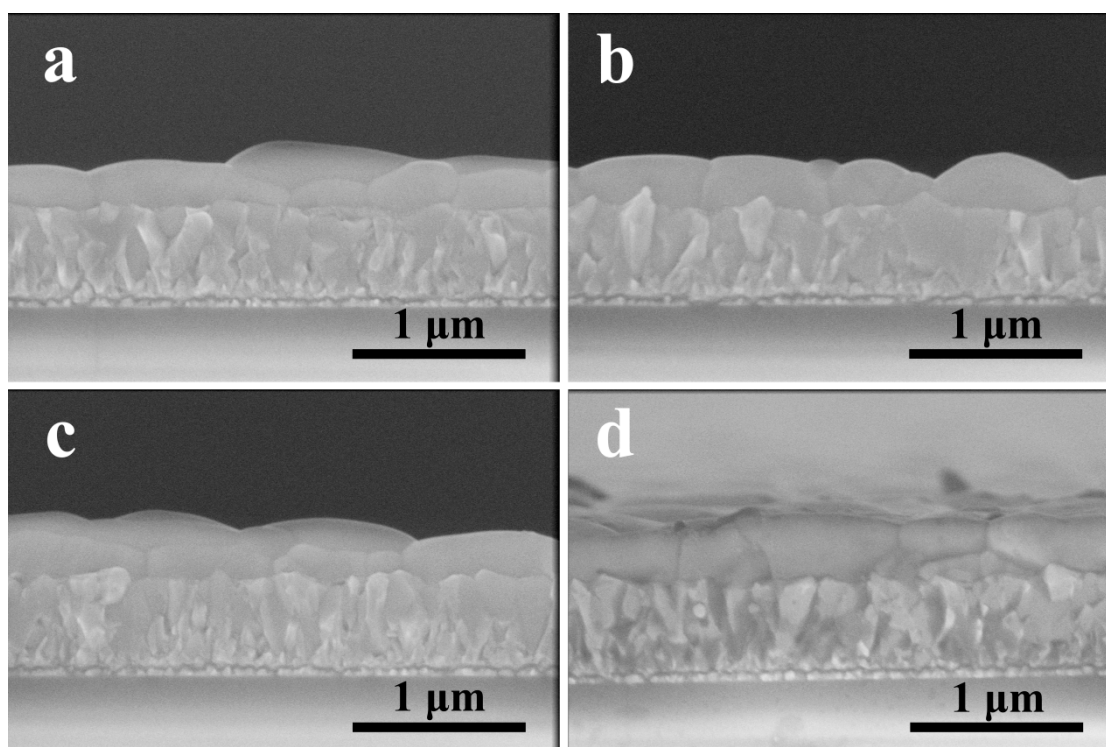

**Figure S2.** Cross-sectional SEM images of  $\text{CsPbBr}_3$  films synthesized with different  $\text{PbBr}_2$  concentration: (a) 1.1 M w/o  $\text{InBr}_3$ ; (b) 1.2 M w/o  $\text{InBr}_3$ ; (c) 1.3 M w/o  $\text{InBr}_3$ ; (d) 1.4 M w/o  $\text{InBr}_3$ .

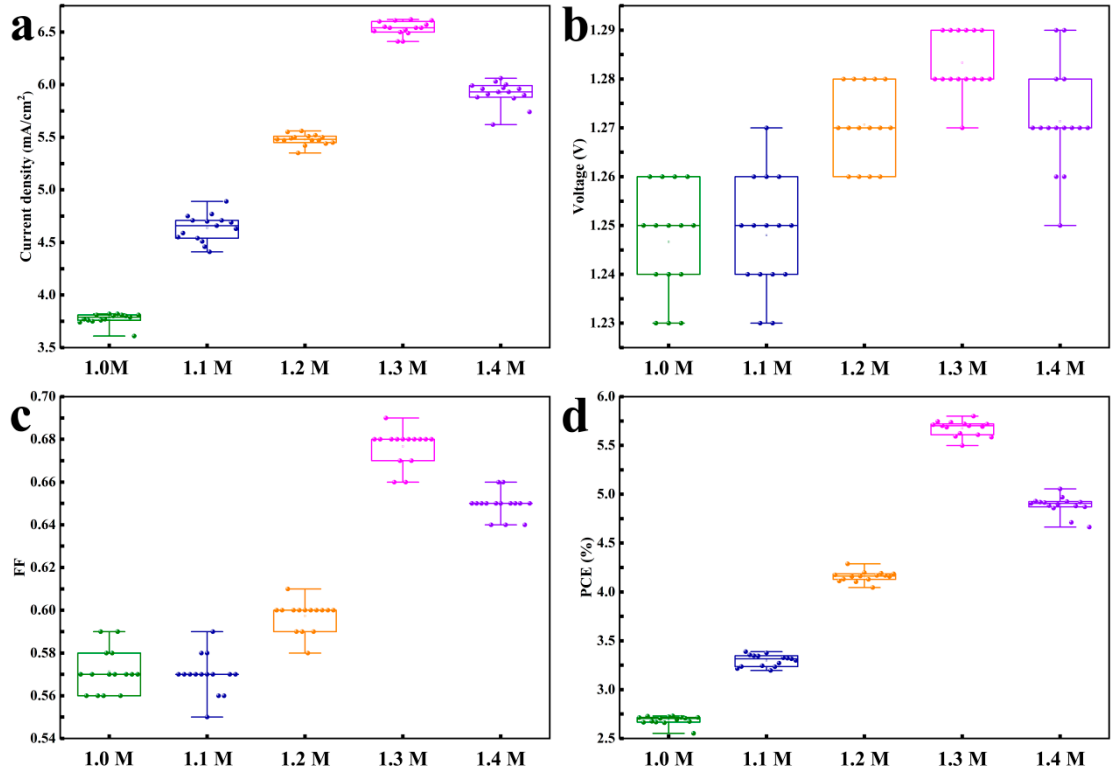

**Figure S3.** The schematic diagram of of 15 CsPbBr<sub>3</sub> PSCs synthesized with different PbBr<sub>2</sub> concentration: (a) J<sub>sc</sub>, (b) V<sub>oc</sub>, (c) FF and (e) PCE.

**Table S1.** The average photovoltaic parameters of 15 CsPbBr<sub>3</sub> PSCs synthesized with different PbBr<sub>2</sub> concentration.

| PbBr <sub>2</sub> concentration |                      | J <sub>sc</sub> (mA/cm <sup>2</sup> ) | V <sub>oc</sub> (V) | FF          | PCE(%)      |
|---------------------------------|----------------------|---------------------------------------|---------------------|-------------|-------------|
| 1.0 M                           | w/ InBr <sub>3</sub> | 3.77 ± 0.16                           | 1.25 ± 0.02         | 0.57 ± 0.02 | 2.68 ± 0.14 |
| 1.1 M                           | w/ InBr <sub>3</sub> | 4.64 ± 0.18                           | 1.25 ± 0.02         | 0.57 ± 0.02 | 3.30 ± 0.13 |
| 1.2 M                           | w/ InBr <sub>3</sub> | 5.48 ± 0.10                           | 1.27 ± 0.01         | 0.60 ± 0.01 | 4.16 ± 0.13 |
| 1.3 M                           | w/ InBr <sub>3</sub> | 6.54 ± 0.13                           | 1.28 ± 0.01         | 0.68 ± 0.01 | 5.68 ± 0.18 |
| 1.4 M                           | w/ InBr <sub>3</sub> | 5.92 ± 0.14                           | 1.27 ± 0.02         | 0.68 ± 0.01 | 4.88 ± 0.12 |

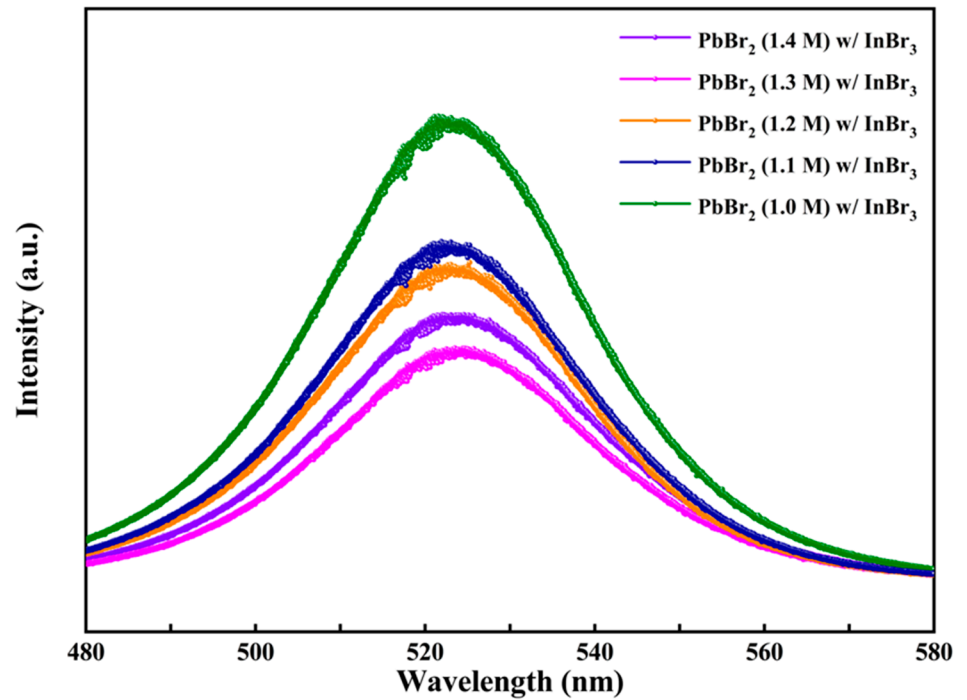

**Figure S4.** PL spectra of the InBr<sub>3</sub>:CsPbBr<sub>3</sub> synthesized with different PbBr<sub>2</sub> concentration.

**Table S2.** The fitted data of TRPL characterization.

| <b>CsPbBr<sub>3</sub></b>             | <b><math>\tau_1</math> (ns)</b> | <b>A<sub>1</sub> (%)</b> | <b><math>\tau_2</math> (ns)</b> | <b>A<sub>2</sub> (%)</b> | <b><math>\tau_{ave}</math> (ns)</b> |
|---------------------------------------|---------------------------------|--------------------------|---------------------------------|--------------------------|-------------------------------------|
| <b>1.3 M<br/>w/ InBr<sub>3</sub></b>  | <b>1.35</b>                     | <b>53.2</b>              | <b>3.06</b>                     | <b>46.8</b>              | <b>2.49</b>                         |
| <b>1.3 M<br/>w/o InBr<sub>3</sub></b> | <b>2.65</b>                     | <b>73.1</b>              | <b>5.61</b>                     | <b>26.9</b>              | <b>3.95</b>                         |
